# Supplementary material for: Rapid and high-sensitivity determination of phenylarsine oxide in environmental samples by a new technique: solid-phase microextraction followed by corona discharge ion mobility spectrometry
Source: Royal Society of Chemistry journal article supplement (doi:10.1039/c9ay02152c), 2019-01-01
Supplement: c9ay02152c1.pdf [file c9ay02152c1.pdf]

## **Supplementary material**

### **Rapid and high-sensitivity determination of phenylarsine oxide in environmental samples by a new technique: solid phase microextraction followed by corona discharge ion mobility spectrometry**

Sajad Asadi, Bozorgmehr Maddah\*

Department of Chemistry, Faculty of Sciences, Imam Hossein University, Tehran, Iran

**Correspondence:** Bozorgmehr Maddah

**Tel:** +98 (21) 77594707, **Fax:** +98 (21) 77104930

**E-mail:** bozorgmaddah@yahoo.com

**Table S1.** Instrumental parameters for CD-IMS.

| Parameter                                  | Setting                   |
|--------------------------------------------|---------------------------|
| Needle voltage                             | 2.0 kV                    |
| Target electrode voltage                   | 7.0 kV                    |
| Drift electric field                       | 400 V cm <sup>-1</sup>    |
| Pressure                                   | ambient                   |
| Drift gas flow (N <sub>2</sub> , 99.99%)   | 1000 mL min <sup>-1</sup> |
| Carrier gas flow (N <sub>2</sub> , 99.99%) | 400 mL min <sup>-1</sup>  |
| Temperature of cell                        | 160 °C                    |
| Temperature of injector                    | 210 °C                    |
| Ion gate pulse                             | 200 μs                    |
| Ion gate voltage                           | 200 V                     |
| Ion gate frequency                         | 25 Hz                     |
| Number of IMS averages                     | 1                         |

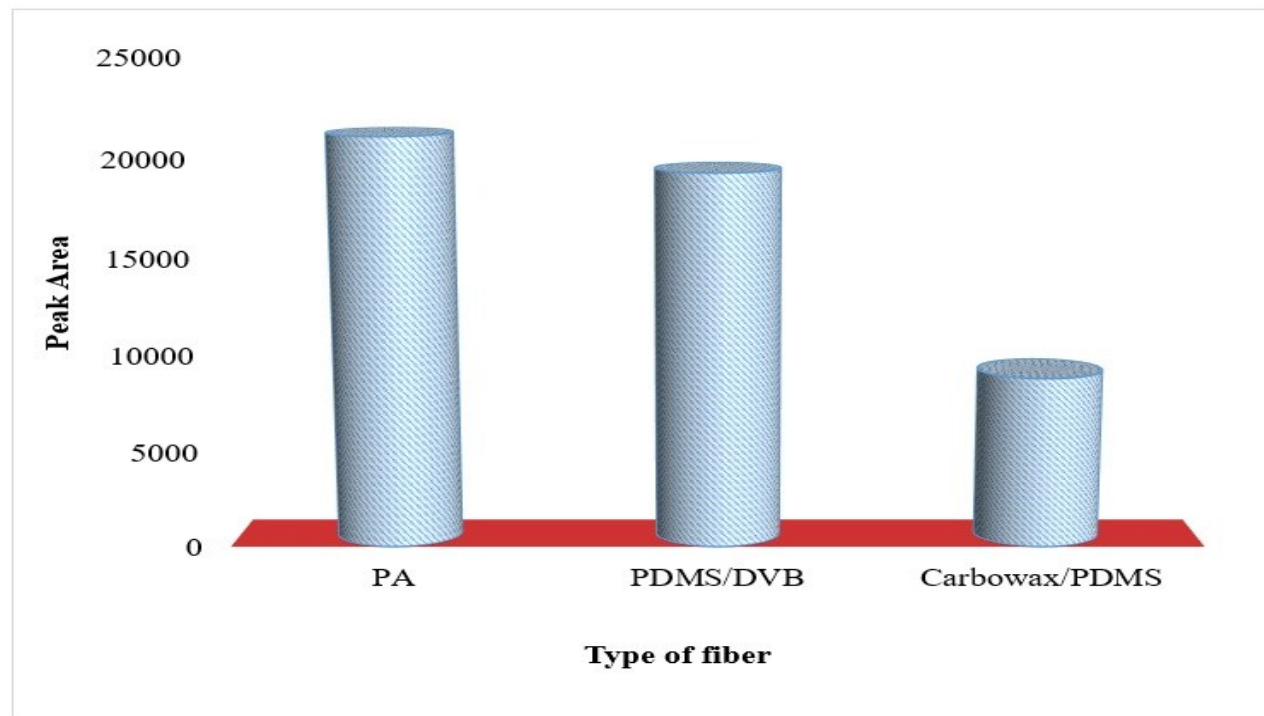

**Fig. S1.** Optimization of fiber type.
